# Supplementary material
Source: Elsevier journal article supplement (https://www.sciencedirect.com/science/article/pii/S2173578619300733)
Supplement: mmc1 [file S2173578619300733:mmc1.pdf]

**ANEXO : Cuestionario sobre aspectos docentes de la INFECCIÓN DEL TRACTO URINARIO.**

### Listado de preguntas:

2. La ITU es una afección poco grave de buen pronóstico:
3. La ITU es principalmente una afectación puntual autolimitada producida por un  
  
microorganismo externo
4. La ITU es un problema sanitario general por el peligro del aumento de resistencias
5. La ITU es un problema que afecta a la gente joven y cambia su estilo de vida y su  
  
comportamiento sexual
6. La ITU tiene un diagnóstico fácil y preciso
7. La ITU tiene un tratamiento fácil y seguro
8. Después de asistir a clase, PARA MÍ HAN QUEDADO MUY CLAROS los conceptos del  
  
DIAGNÓSTICO DE LA ITU
9. Después de asistir a clase, PARA MÍ HAN QUEDADO MUY CLAROS los conceptos del  
  
TRATAMIENTO DE LA ITU
10. La metodología docente acerca de la ITU ha sido apropiada
11. Debería cambiarse la forma de explicarse la infección del trato urinario.
